# Supplementary material for: Alpha-Smooth Muscle Actin-Positive Perivascular Cells in Diabetic Retina and Choroid
Source: PubMed Central journal article supplement (PMC7139401; doi:10.3390/ijms21062158), 2020-03-20
Supplement: ijms-21-02158-s001.pdf [file ijms-21-02158-s001.pdf]

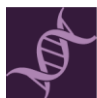

Supplementary Materials

## Alpha-Smooth Muscle Actin-Positive Perivascular Cells in Diabetic Retina and Choroid

Soo Jin Kim <sup>1</sup>, Sang A. Kim <sup>1</sup>, Yeong A. Choi <sup>1</sup>, Do Young Park <sup>1</sup>, and Junyeop Lee <sup>2,\*</sup>

<sup>1</sup> Department of Ophthalmology, Yeungnam University College of Medicine, Daegu, Republic of Korea; freicas@naver.com (S.J.K.); zzanga5897@naver.com (S.A.K.); kei97437@gmail.com (Y.A.C.); doyoung83.park@gmail.com (D.Y.P.)

<sup>2</sup> Department of Ophthalmology, Asan Medical Center, University of Ulsan, College of Medicine, Seoul, Republic of Korea

\* Correspondence: jleeamc@gmail.com (J.L.); Tel.: +82-2-3010-3680

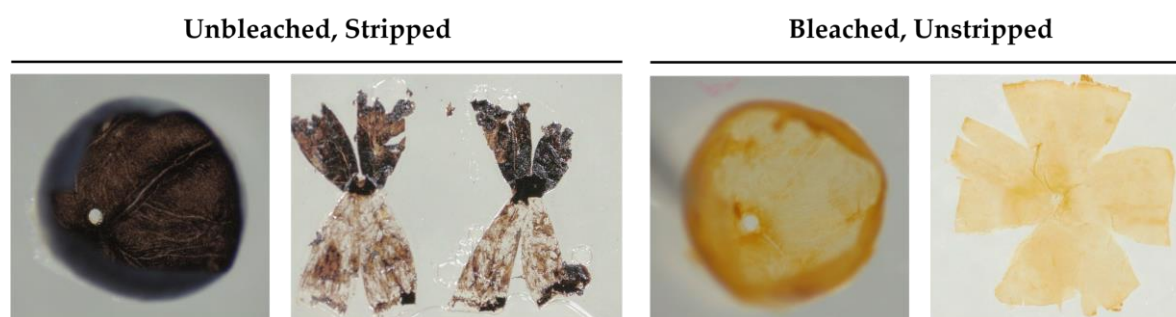

**Figure S1. Induction of transparent choroid by bleaching of choroidal melanocytes and RPE pigments in C57Bl/6 mouse.** Left shows a previously-used method; RPE-choroidal layer was stripped from sclera. Right shows a bleaching method; choroid exposed to 3% hydrogen peroxide at 4 °C for 5 days. The bleaching method does not require any stripping but have some limitations that they may lose affinity or activity of certain types of surface markers and autofluorescence.

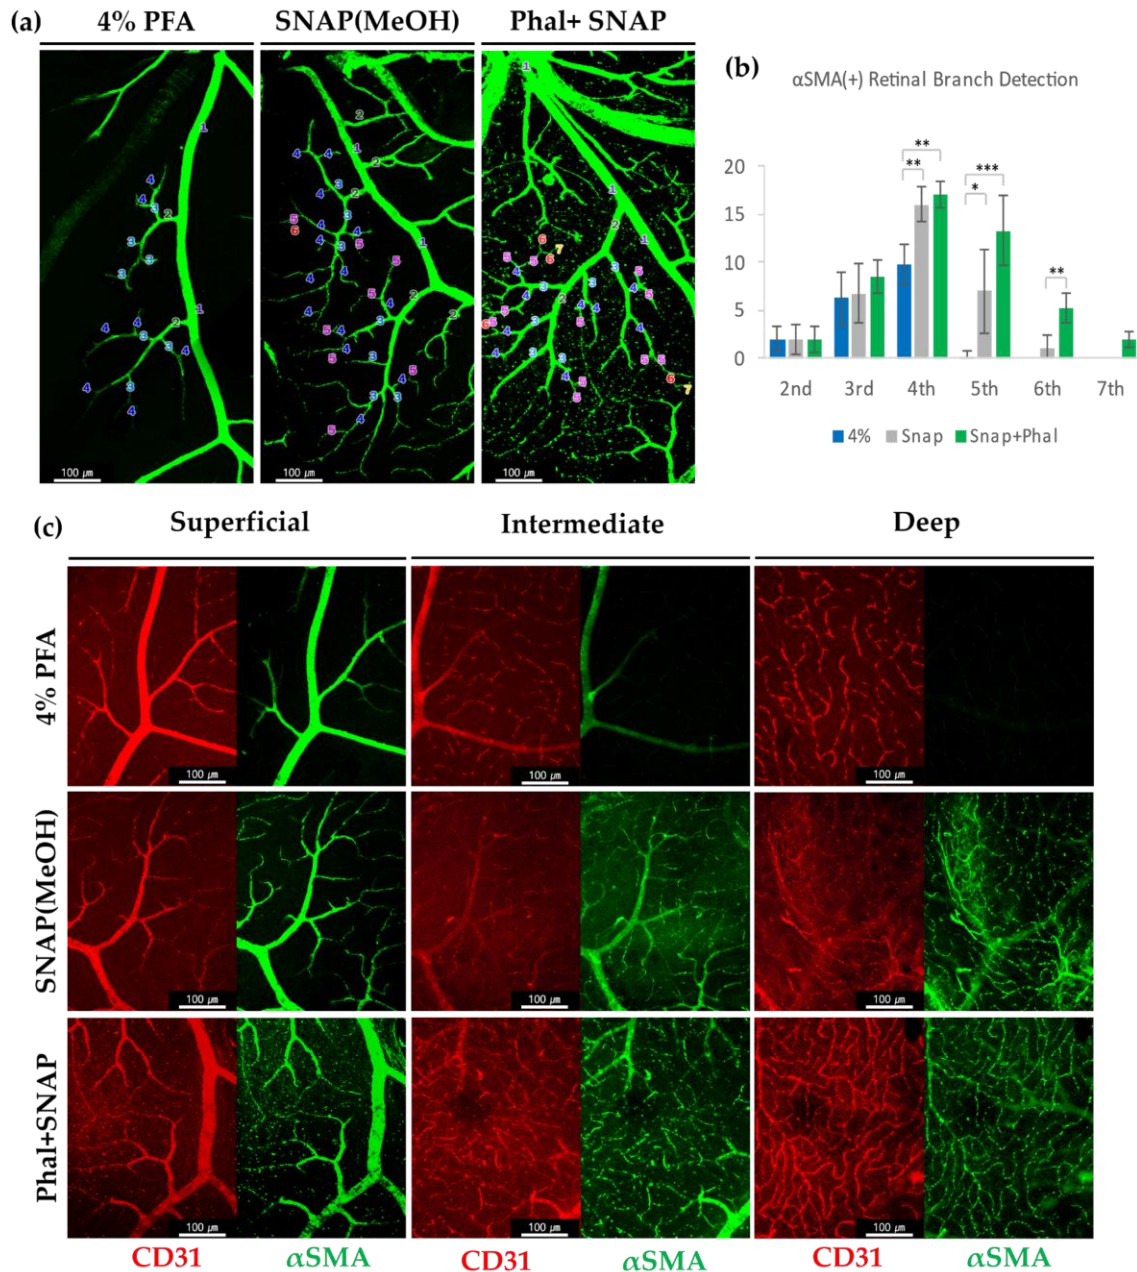

**Figure S2.  $\alpha$ SMA expression in capillaries of the retina and choroid.** (a)  $\alpha$ SMA-positive branch order in the retina were compared among PFA fixation, snap fixation, and snap fixation after intravitreal injection of phalloidin (Phal+SNAP) (b) Quantifications of  $\alpha$ SMA-positive retinal branch detection. To properly compare the order of the detected branch, the number of branches were computed as counts per two 2nd-order branches. Error bars indicate SD. (2-way Anova; N=10 per group, \* $p < 0.05$ , \*\* $p < 0.01$ , \*\*\* $p < 0.001$ ) (c)  $\alpha$ SMA detection in the three different capillary plexuses of the retina.
